# Supplementary material for: Elucidating the phylodynamics of endemic rabies virus in eastern Africa using whole-genome sequencing
Source: PubMed Central journal article supplement (PMC5014479; doi:10.1093/ve/vev011), 2015-09-10
Supplement: S1_Figure.pdf [file S1_Figure.pdf]

RABV clade

- Africa1
- Africa2
- Africa3
- △ Africa4

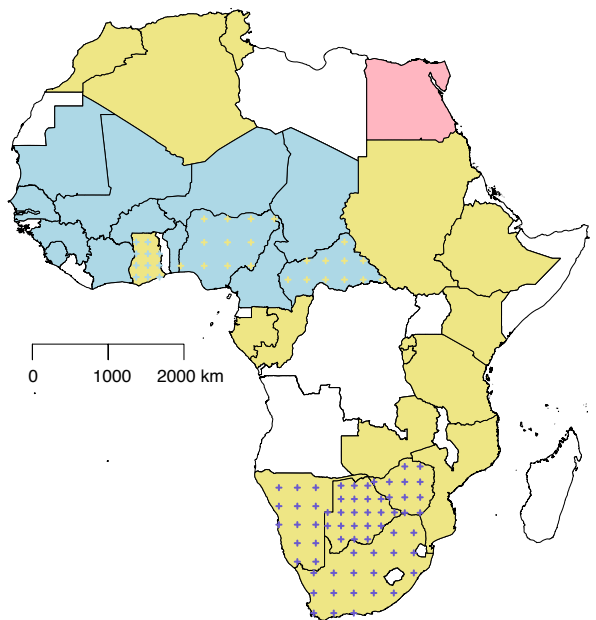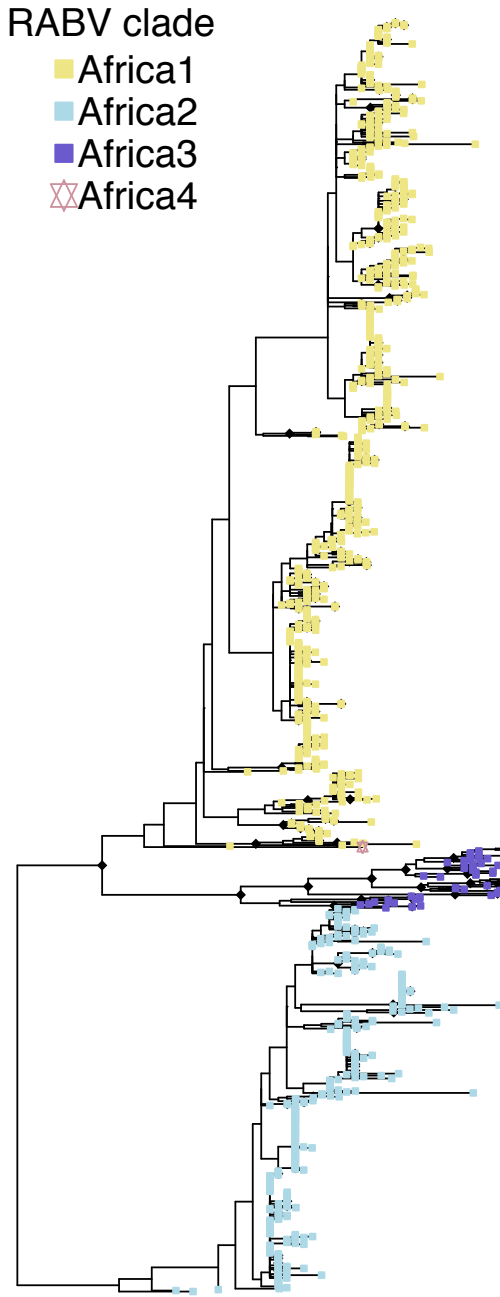

Nucleoprotein 405bp

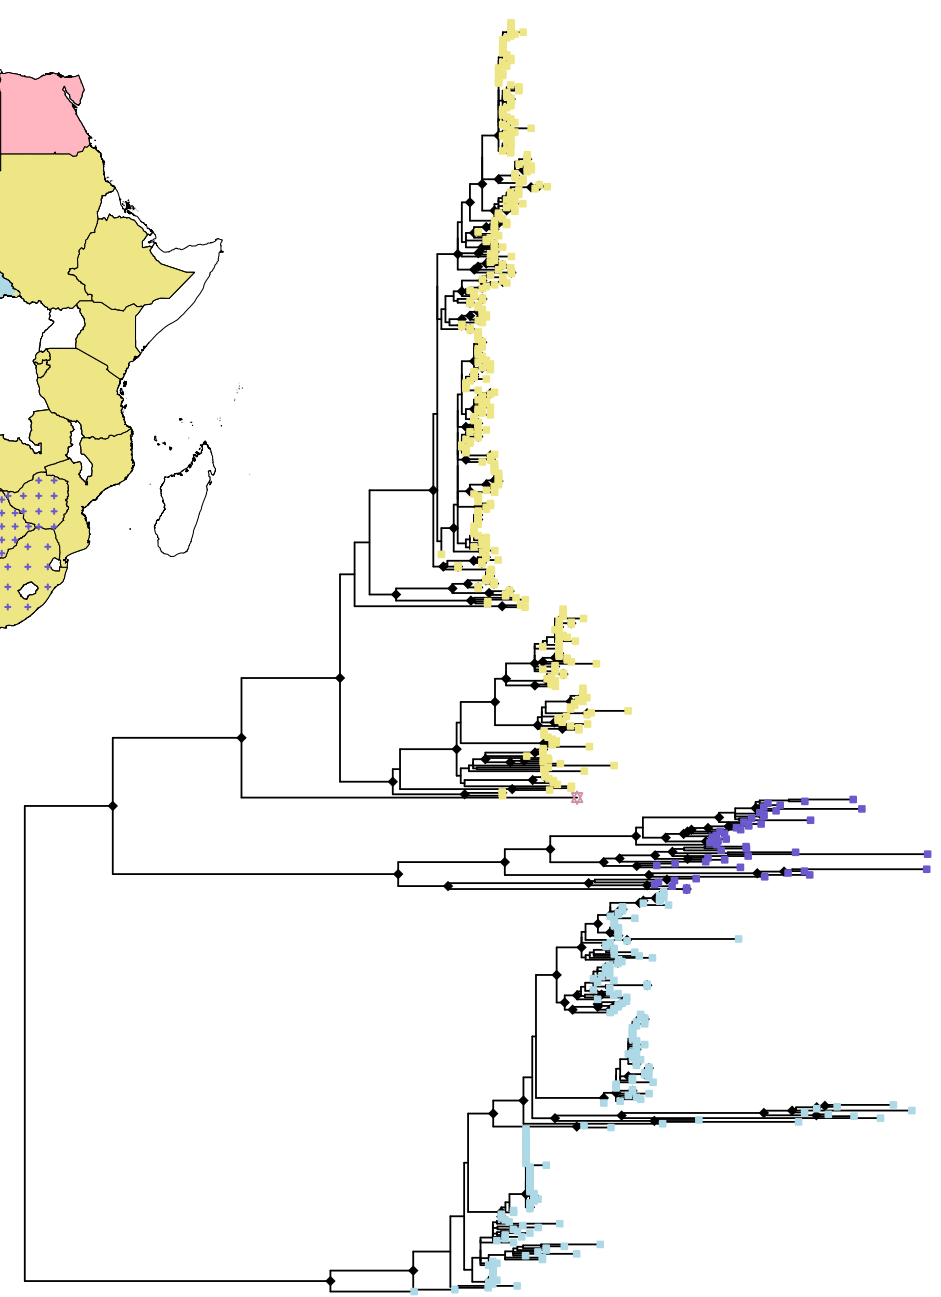

Nucleoprotein 1350bp
