# Supplementary material for: Elucidating the phylodynamics of endemic rabies virus in eastern Africa using whole-genome sequencing
Source: PubMed Central journal article supplement (PMC5014479; doi:10.1093/ve/vev011), 2015-09-10

a)

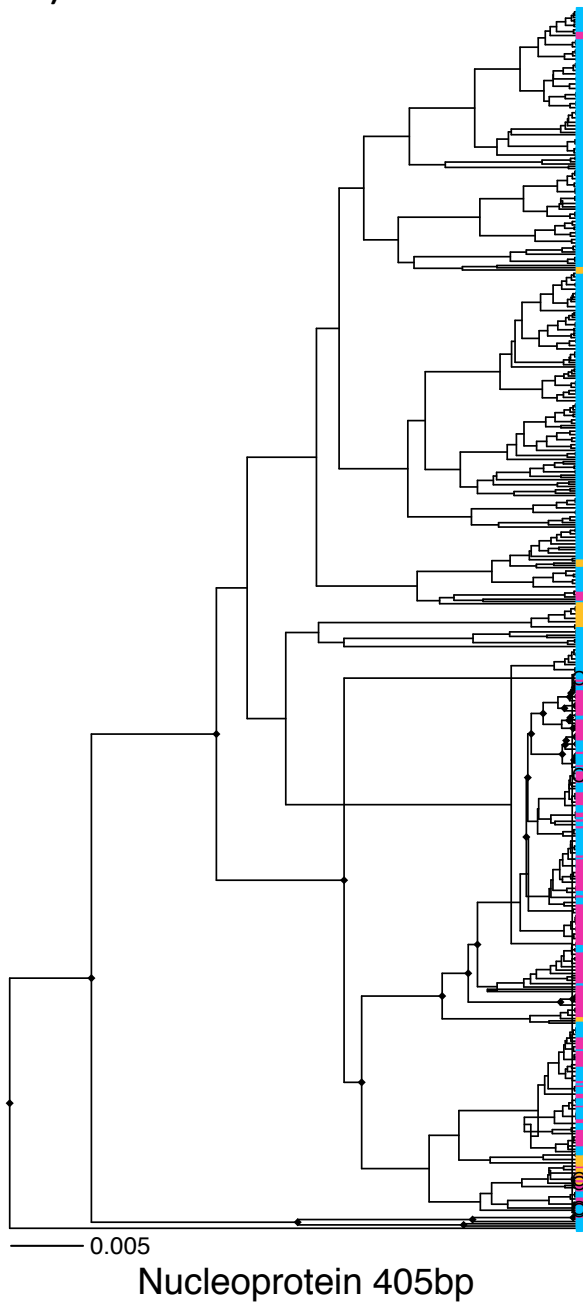

b)

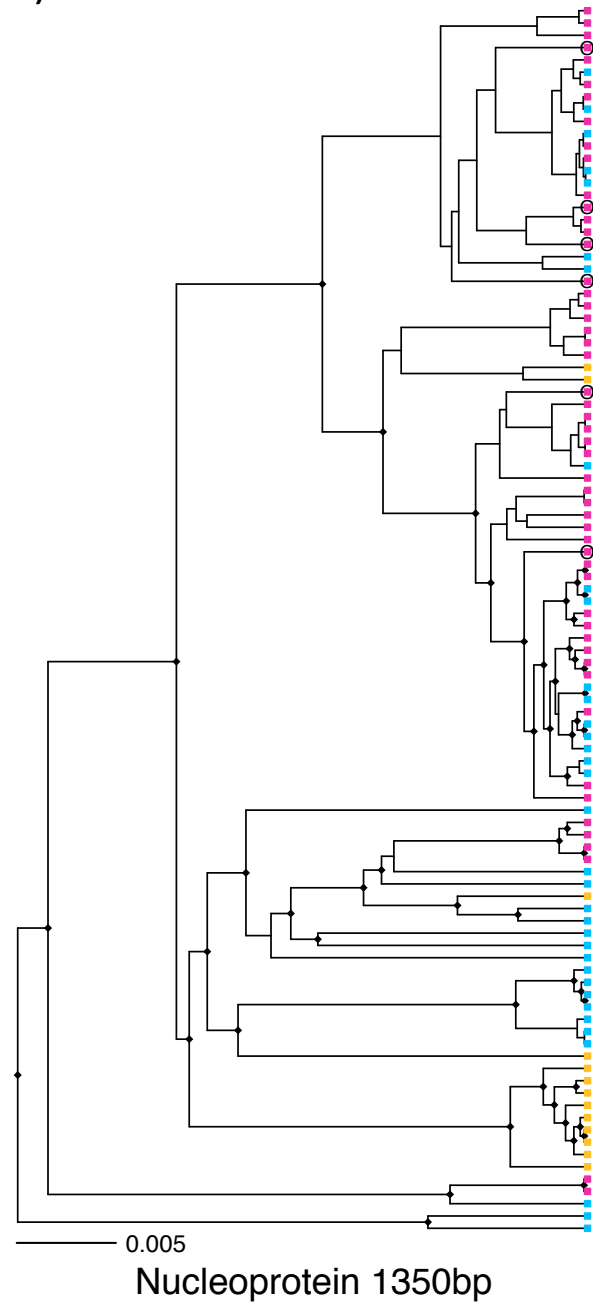

c)

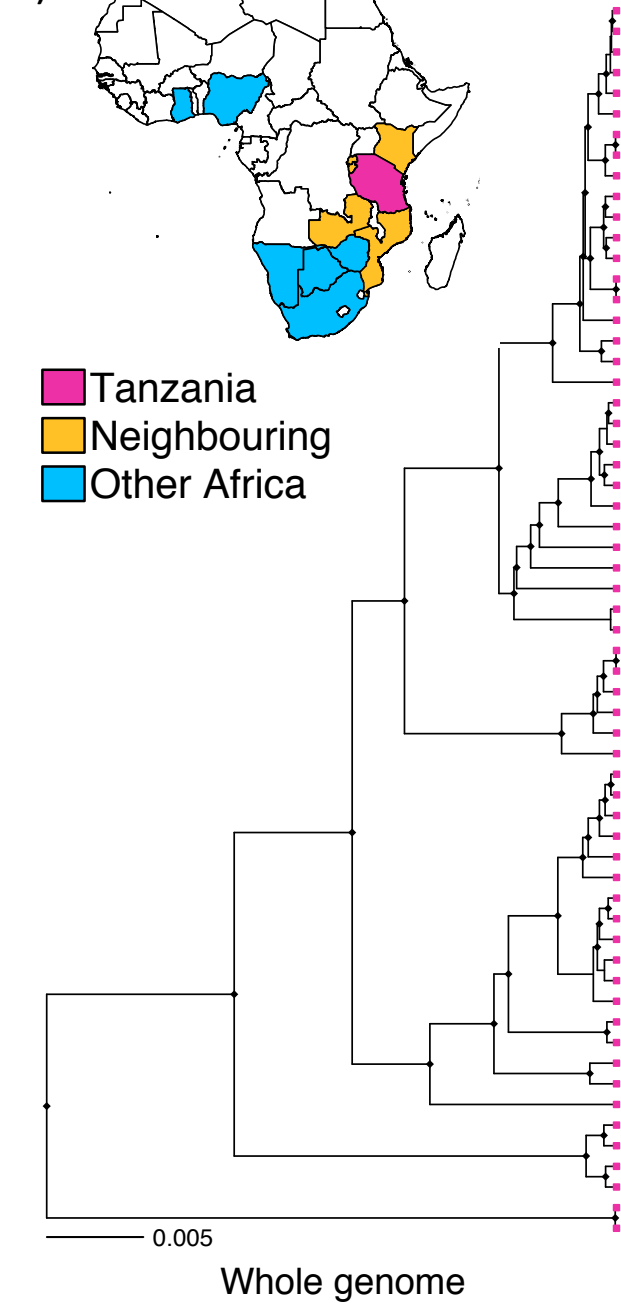

Supplement: S3_Figure.pdf [file S3_Figure.pdf]
