# Supplementary material for: Elucidating the phylodynamics of endemic rabies virus in eastern Africa using whole-genome sequencing
Source: PubMed Central journal article supplement (PMC5014479; doi:10.1093/ve/vev011), 2015-09-10

| From         | To           | BF     | Transitions |
|--------------|--------------|--------|-------------|
| North        | South        | 7.48   | 13          |
| North        | Pemba island | 9.40   | 3           |
| Pemba island | North        | 219.91 | 1           |

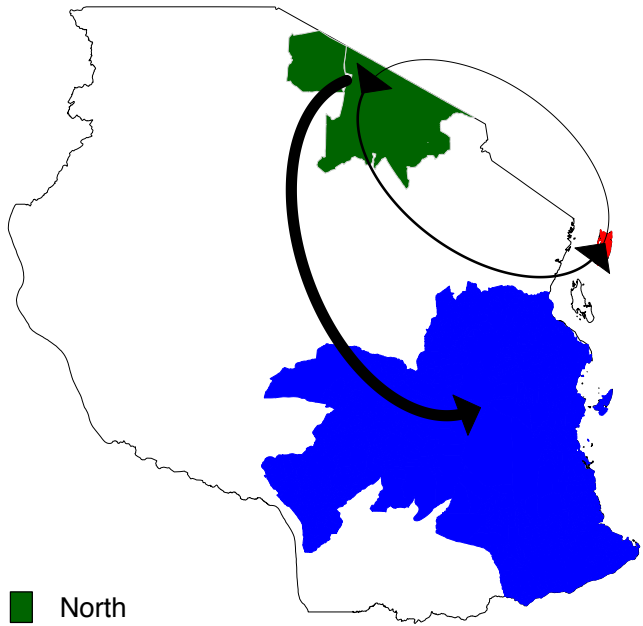

- North
- South
- Island

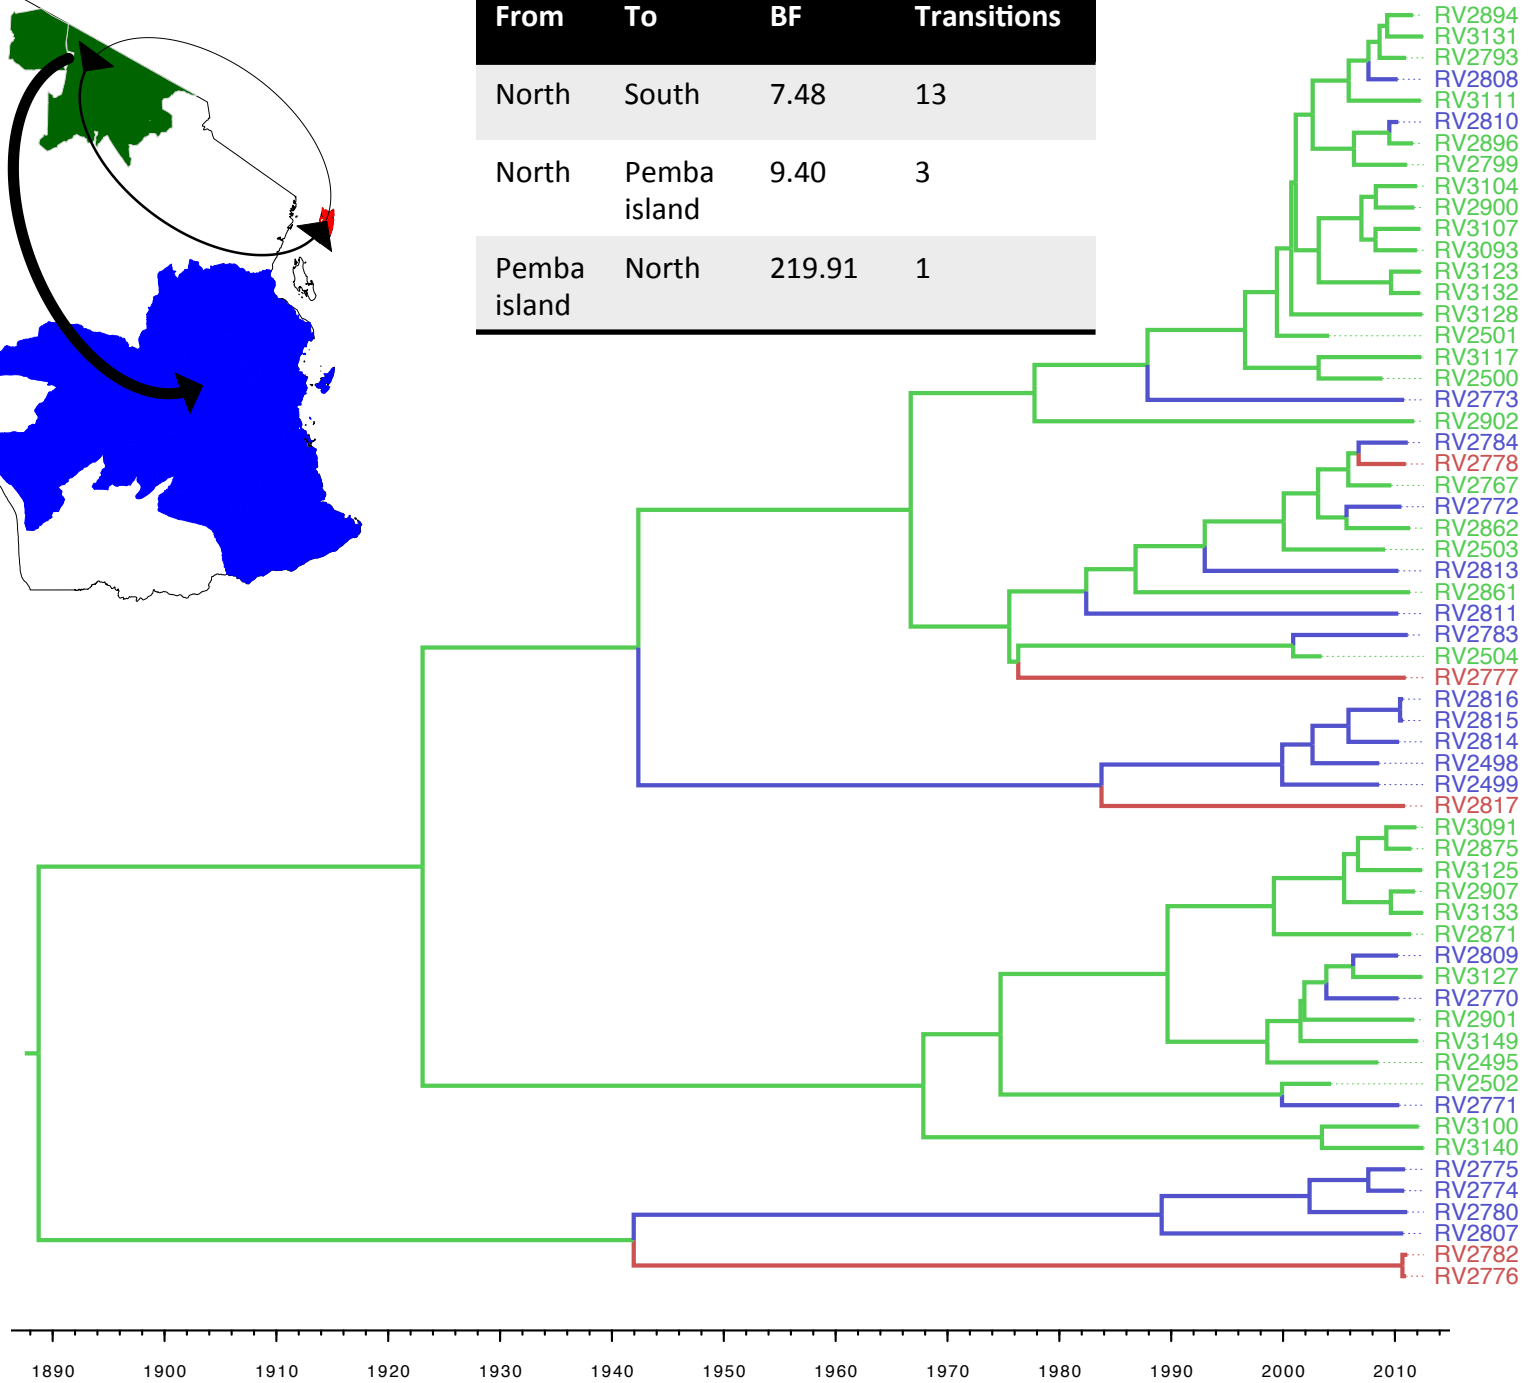

Supplement: S4_Figure.pdf [file S4_Figure.pdf]
